# Supplementary material for: Cyclic di-GMP differentially tunes a bacterial flagellar motor through a novel class of CheY-like regulators
Source: eLife journal article supplement (doi:10.7554/elife.28842), 2017-11-01
Supplement: supp [file elife-28842-supp-v1.zip]

Archive with 11 entries (11 files):
- elife_poa_e28842_Figure_3_figure_supplement_2.ai
- elife_poa_e28842_Movie_2.avi
- elife_poa_e28842_Movie_1.avi
- elife_poa_e28842_Figure_3_figure_supplement_1.ai
- elife_poa_e28842_Figure_5_figure_supplement_1.ai
- elife_poa_e28842_Transparent_Reporting_File.pdf
- elife_poa_e28842_Figure_2_figure_supplement_1.ai
- elife_poa_e28842_Figure_4_figure_supplement_2.ai
- elife_poa_e28842_Figure_1_figure_supplement_1.ai
- elife_poa_e28842_Figure_4_figure_supplement_1.ai
- elife_poa_e28842_Figure_7_figure_supplement_1.ai
